# Supplementary material
Source: PubMed Central journal article supplement (PMC6850797)
Supplement: AnnalsATS.201808-510OC_whittaker+brown_data_supplement.pdf [file AnnalsATS.201808-510OC_whittaker%2Bbrown_data_supplement.pdf]

## **Online Data Supplement**

### **Outcomes of Older Patients with Pulmonary Fibrosis and Non-Small Cell Lung Cancer**

Stacey-Ann Whittaker Brown, MD, MPH, Maria Padilla, MD, Grace Mhango, MPH, Emanuela Taioli, MD, PhD, Charles Powell, MD, Juan Wisnivesky, MD, DrPH

Supplemental Table E1. List of Standard Exclusionary Interstitial Lung Disease Diagnoses

| ICD-9-CM Code | Description                                                               |
|---------------|---------------------------------------------------------------------------|
| 135           | Sarcoidosis                                                               |
| 237·7         | Neurofibromatosis                                                         |
| 272·7         | Lipidoses                                                                 |
| 277·3         | Amyloidosis                                                               |
| 277·8         | Other specified disorders of metabolism – includes eosinophilic granuloma |
| 446·21        | Goodpasture’s syndrome                                                    |
| 446·4         | Wegener’s granulomatosis                                                  |
| 495           | Extrinsic allergic alveolitis                                             |
| 500           | Coal workers’ pneumoconiosis                                              |
| 501           | Asbestosis                                                                |
| 502           | Pneumoconiosis due to other silica or silicates                           |
| 503           | Pneumoconiosis due to other inorganic dust                                |
| 504           | Pneumoconiosis due to inhalation of other dust                            |
| 505           | Pneumoconiosis, unspecified                                               |
| 506·4         | Chronic respiratory conditions due to fumes or vapors                     |
| 508·1         | Chronic and other pulmonary manifestations due to radiation               |
| 508·8         | Respiratory conditions due to other specified external agents             |
| 515           | Postinflammatory pulmonary fibrosis*                                      |
| 516·0         | Pulmonary alveolar proteinosis                                            |
| 516·1         | Idiopathic pulmonary hemosiderosis                                        |
| 516·2         | Pulmonary alveolar microlithiasis                                         |
| 516·8         | Other specified alveolar and parietoalveolar pneumonopathies              |
| 516·9         | Unspecified alveolar and parietoalveolar pneumonopathies                  |
| 517·0         | Lung involvement in conditions classified elsewhere                       |
| 517·2         | Lung involvement in systemic sclerosis                                    |
| 517·8         | Lung involvement in other diseases classified elsewhere                   |
| 518·3         | Pulmonary eosinophilia                                                    |
| 555           | Regional enteritis                                                        |
| 710·0         | Systemic lupus erythematosus                                              |
| 710·1         | Systemic sclerosis                                                        |
| 710·2         | Sjögren’s disease                                                         |
| 710·3         | Dermatomyositis                                                           |

| ICD-9-CM Code | Description            |
|---------------|------------------------|
| 710.4         | Polymyositis           |
| 714.0         | Rheumatoid Arthritis** |
| 714.81        | Rheumatoid lung        |
| 720           | Ankylosing spondylitis |
| 759.5         | Tuberous sclerosis     |

\*Post-inflammatory pulmonary fibrosis was not excluded

\*\*Rheumatoid arthritis was added to the list of exclusionary criteria

Supplemental Table E2. Treatment Strategies of Lung Cancer in Patients with and without Idiopathic Pulmonary Fibrosis

| Characteristics                  | Without IPF*<br>(n=53,598) | IPF*<br>(n=855) | p value |
|----------------------------------|----------------------------|-----------------|---------|
| Stage Appropriate Therapy, N (%) | 26,358 (49)                | 406 (48)        | 0.33    |
| Stage I                          | 8713 (65)                  | 165 (62)        | 0.26    |
| Stage II                         | 2721 (54)                  | 45 (52)         | 0.73    |
| Stage III                        | 4979 (46)                  | 81 (41)         | 0.08    |
| Stage IV                         | 9945 (40)                  | 115 (38)        | 0.38    |
| Surgical Resection, N (%)        |                            |                 |         |
| Stage I                          | 8713 (65)                  | 165 (62)        | 0.26    |
| Stage II                         | 2721 (54)                  | 45 (52)         | 0.73    |
| Stage IIIA                       | 1675 (24)                  | 22 (16)         | 0.02    |
| All Stage III                    | 1769 (20)                  | 24 (14)         | 0.03    |
| Surgical Resection Type, N (%)   |                            |                 |         |
| Sublobar Resection               | 2481 (18)                  | 73 (29)         | <0.01   |
| Stage I                          | 1161 (19)                  | 48 (29)         |         |
| Lobectomy                        | 10321 (74)                 | 167 (66)        |         |
| Stage I                          | 6674 (76)                  | 109 (66)        |         |
| Other                            | 1155 (8)                   | 14 (5)          |         |
| Chemotherapy, N (%)              |                            |                 |         |
| Stage III                        | 5695 (53)                  | 100 (50)        | 0.34    |
| Stage IV                         | 9945 (40)                  | 115 (38)        | 0.38    |
| Radiation Therapy, N (%)         |                            |                 |         |
| Stage I                          | 2418 (18)                  | 61 (23)         | 0.05    |
| Stage II                         | 1424 (28)                  | 30 (35)         | 0.19    |
| Stage III                        | 5124 (48)                  | 101 (51)        | 0.50    |
| Stage IV                         | 9790 (40)                  | 93 (31)         | <0.01   |

\*IPF- Idiopathic pulmonary fibrosis

Supplemental Table E3. Cause of Death for Lung Cancer Patients with and without Pulmonary Fibrosis

| Cause of Death         | No IPF*<br>(n=36,419) | IPF*<br>(n=632) | p value |
|------------------------|-----------------------|-----------------|---------|
| Lung Cancer            | 29,968 (82)           | 501 (79)        | 0.09    |
| Cardiovascular Disease | 1,802 (5)             | 33 (5)          |         |
| Respiratory Failure    | 879 (2)               | 25 (4)          |         |
| Other                  | 3,770 (9)             | 73 (6)          |         |

\*IPF-pulmonary fibrosis

Supplemental Table E4. Sensitivity Analysis using a Modified Pulmonary Fibrosis Coding Strategy: Table of Baseline Characteristics

| Characteristics                             | No IPF*<br>(n=54,299) | With IPF*<br>(n=154) | p value |
|---------------------------------------------|-----------------------|----------------------|---------|
| Age, median (IQR)                           | 74 (69-80)            | 76 (71-80)           | 0.04    |
| Male Gender, N (%)                          | 28,533 (53)           | 88 (57)              | 0.25    |
| Comorbidity Score, N (%)                    |                       |                      |         |
| 0                                           | 26,398 (49)           | 44 (29)              | <0.01   |
| 1-2                                         | 20,010 (37)           | 69 (45)              |         |
| >2                                          | 7,891 (15)            | 41 (27)              |         |
| Indicators of Poor Functional Status, N (%) |                       |                      |         |
| Nursing Home or Home Health Services        | 7,581 (14)            | 27 (18)              | 0.20    |
| Supplemental Oxygen                         | 4,052 (8)             | 33 (21)              | <0.01   |
| Cancer Stage, N (%)                         |                       |                      |         |
| I-II                                        | 18,631 (34)           | 64 (41)              | 0.04    |
| III                                         | 10,828 (20)           | 35 (23)              |         |
| IV                                          | 24,840 (46)           | 55 (36)              |         |
| Tumor Size, in mm, median IQR               | 35 (23-54)            | 30 (20-45)           | 0.02    |
| Histology, N (%)                            |                       |                      |         |
| Adenocarcinoma                              | 29,895 (55)           | 64 (42)              | 0.02    |
| Squamous Cell Carcinoma                     | 18,866 (35)           | 74 (48)              |         |
| Other Histology                             | 5,560 (10)            | 16 (10)              |         |
| Location, N (%)                             |                       |                      |         |
| Upper Lobe                                  | 28,012 (52)           | 59 (38)              | 0.02    |
| Lower Lobe                                  | 15,282 (28)           | 64 (42)              |         |
| Other Site                                  | 11,005 (20)           | 31 (20)              |         |

\*IPF- pulmonary fibrosis

Supplemental Table E5. Stage-Appropriate Therapy and Mortality in those with Idiopathic Pulmonary Fibrosis as defined by the Modified Algorithm.

|                                                 | Entire Cohort |                  | Received Stage- Appropriate Therapy |                  | Did not Receive Stage-Appropriate Therapy |                   |
|-------------------------------------------------|---------------|------------------|-------------------------------------|------------------|-------------------------------------------|-------------------|
|                                                 | No IPF*       | IPF              | No IPF                              | IPF              | No IPF                                    | IPF               |
| <u>No. of subjects</u>                          | 54,299        | 154              | 26,692                              | 72               | 27,607                                    | 82                |
| <u>Probability of Stage-Appropriate Therapy</u> |               |                  |                                     |                  |                                           |                   |
| Unadjusted OR** (95% CI)                        | 1 (Ref)       | 0.91 (0.66-1.25) | -                                   | -                | -                                         | -                 |
| Adjusted OR† (95% CI)                           | 1 (Ref)       | 0.86 (0.61-1.20) | -                                   | -                | -                                         | -                 |
| <u>Overall Survival</u>                         |               |                  |                                     |                  |                                           |                   |
| Unadjusted HR** (95% CI)                        | 1 (Ref)       | 1.28 (1.08-1.52) | 1 (Ref)                             | 1.36 (1.05-1.77) | 1 (Ref)                                   | 1.20 (0.96- 1.50) |
| Adjusted HR‡ (95% CI)                           | 1 (Ref)       | 1.28 (1.08-1.51) | 1 (Ref)                             | 1.64 (1.26-2.13) | 1 (Ref)                                   | 1.13 (0.91-1.42)  |
| <u>Lung Cancer-Specific Survival</u>            |               |                  |                                     |                  |                                           |                   |
| Unadjusted HR (95% CI)                          | 1 (Ref)       | 1.22 (0.99-1.51) | 1 (Ref)                             | 1.26 (0.88-1.79) | 1 (Ref)                                   | 1.14 (0.88-1.49)  |
| Adjusted HR (95% CI)                            | 1 (Ref)       | 1.18 (0.96-1.46) | 1 (Ref)                             | 1.61 (1.13-2.29) | 1 (Ref)                                   | 1.07 (0.82-1.40)  |

\* IPF- Idiopathic pulmonary fibrosis

\*\*OR- Odds ratio

† adjusting for age, gender, marital status, ethnicity, income, charlson comorbidity, tumor size, histology, site and TNM stage, functional status and pulmonary disability and stage-appropriate therapy

‡HR- Hazard Ratio
